# Supplementary material for: Twelve-month follow-up effects of cognitive training after heart valve surgery on cognitive functions and health-related quality of life: a randomised clinical trial
Source: PubMed Central journal article supplement — Open Heart. 2023 Nov 27;10(2):e002411. doi: 10.1136/openhrt-2023-002411 (PMC10685926; doi:10.1136/openhrt-2023-002411), 2023-11-27
Supplement: openhrt-2023-002411supp001.pdf [file openhrt-2023-002411supp001.pdf]

1 **Supplementary files**2 **Supplementary table 1:** Definition of neuropsychological parameters and cognitive subdomains.

| <b>Cognitive domain (DSM-5)</b> | <b>Cognitive subdomains (DSM-5)</b> | <b>Neuropsychological parameter</b> | <b>Task (scale of measurement)</b>                                                   |
|---------------------------------|-------------------------------------|-------------------------------------|--------------------------------------------------------------------------------------|
| Learning and memory             | Visual Immediate memory span        | SKT                                 | Recalling objects immediately (number of false items)                                |
|                                 |                                     | BTT                                 | Tapping blocks in a given order (span forward)                                       |
|                                 | Visual free recall                  | SKT                                 | Recalling objects after delay (number of false items)                                |
|                                 | Visual recognition memory           | SKT                                 | Recognising between learned and new objects (number of false items)                  |
|                                 |                                     | NVLT                                | Recognising repeated abstract figures (number of correct items)                      |
|                                 | Verbal Immediate memory span        | VLMT                                | Recalling items on a word list (number of correct items- first trial)                |
|                                 |                                     | VLMT                                | Recalling items on a word list (summarised number of correct items- learning trials) |
|                                 |                                     | VLMT                                | Recalling items on a word list (number of correct items- short delay)                |
|                                 |                                     | VLMT                                | Recalling items on a word list (number of correct items- long delay)                 |
| Complex attention               | Selective attention                 | TMT-A (speed)                       | Linking numbers in ascending order (seconds)                                         |
|                                 |                                     | AKT (speed)                         | Marking target stimuli (seconds)                                                     |
|                                 |                                     | AKT (accuracy)                      | Marking target stimuli (number of correct items)                                     |

|                     |                       |                |                                                                        |
|---------------------|-----------------------|----------------|------------------------------------------------------------------------|
| Executive functions | Verbal working memory | LNS            | Mental reorganisation of letters and numbers (span)                    |
|                     | Visual working memory | BTT            | Tapping blocks in a given order (span backward)                        |
|                     | Cognitive flexibility | TMT-B (speed)  | Linking numbers and letters in alternate order (seconds)               |
|                     | Inhibition            | SKT            | Naming interfering letter e.g. "S" instead of "T" (seconds)            |
|                     | Decision making       | SVT            | Selecting target symbol from several symbols (number of correct items) |
| Language            | Word fluency          | RWT (phonetic) | Naming words with a specific initial letter (number of correct items)  |
|                     |                       | RWT (semantic) | Naming words from a specific category (number of correct items)        |

- 1 SKT=Syndrom-Kurztest (Short Performance Test). BTT=Block-Tapping Test. NVLT=Non-Verbal Learning Test.
- 2 VLMT=Verbaler Lern- und Merkfähigkeitstest (Auditory Verbal Learning and Memory Test). TMT=Trail Making
- 3 Test. AKT=Alterskonzentrationstest (Geriatric Concentration Test). LNS=Letter Number Span.
- 4 SVT=Symbolverarbeitungstest (Symbol Processing Task). RWT=Regensburger Wortflüssigkeits-Test
- 5 (Regensburger Word Fluency Test).

6

7 **Supplementary Table 2:** Neuropsychological test results per group and assessment time

| Test parameter                      | Baseline (n=46) |      |                |      | 12-month follow up (n=46) |      |                |      | p     | $\eta^2$ |
|-------------------------------------|-----------------|------|----------------|------|---------------------------|------|----------------|------|-------|----------|
|                                     | Training (n=19) |      | Control (n=27) |      | Training (n=19)           |      | Control (n=27) |      |       |          |
|                                     | $\bar{x}$       | s    | $\bar{x}$      | s    | $\bar{x}$                 | s    | $\bar{x}$      | s    |       |          |
| SKT visual immediate memory span    | 5.6             | 1.5  | 6.0            | 1.3  | 5.1                       | 1.5  | 5.7            | 1.3  | 0.225 | 0.03     |
| SKT inhibition (speed) <sup>*</sup> | 25.3            | 6.0  | 26.9           | 5.7  | 23.6                      | 4.8  | 27.1           | 5.4  | 0.144 | 0.05     |
| TMT-A selective attention (speed)   | 37.3            | 10.5 | 41.4           | 11.4 | 37.6                      | 15.0 | 40.8           | 10.5 | 0.679 | 0.00     |
| TMT-B cognitive flexibility (speed) | 88.9            | 37.0 | 97.7           | 25.8 | 87.7                      | 36.0 | 99.7           | 29.5 | 0.43  | 0.01     |

|                                            |      |     |      |      |      |     |      |      |       |      |
|--------------------------------------------|------|-----|------|------|------|-----|------|------|-------|------|
| SKT visual free recall                     | 6.5  | 1.6 | 6.7  | 1.9  | 6.2  | 1.8 | 7.0  | 1.8  | 0.18  | 0.03 |
| SKT visual recognition memory*             | 2.1  | 1.5 | 1.7  | 1.6  | 1.5  | 1.1 | 2.2  | 1.7  | 0.034 | 0.10 |
| RWT word fluency (semantic)                | 22.4 | 6.2 | 21.2 | 5.5  | 21.2 | 6.0 | 20.7 | 5.1  | 0.618 | 0.00 |
| RWT word fluency (phonetic)                | 10.5 | 3.0 | 11.9 | 5.3  | 12.0 | 4.0 | 12.3 | 5.3  | 0.388 | 0.01 |
| VLMT verbal immediate memory span          | 5.4  | 2.0 | 4.9  | 1.5  | 6.2  | 1.6 | 5.1  | 2.1  | 0.12  | 0.04 |
| VLMT verbal free recall (learning process) | 43.0 | 9.8 | 39.4 | 10.9 | 46.4 | 9.7 | 42.6 | 10.9 | 0.633 | 0.00 |
| VLMT verbal free recall (short delay)      | 8.3  | 2.6 | 7.5  | 3.2  | 9.1  | 3.5 | 8.7  | 3.7  | 0.718 | 0.00 |
| NVLT visual recognition memory*            | 12.9 | 2.9 | 12.5 | 2.8  | 12.2 | 2.6 | 11.8 | 4.1  | 0.728 | 0.00 |
| AKT selective attention (speed)            | 32.6 | 7.0 | 33.9 | 8.9  | 32.2 | 8.1 | 33.9 | 8.3  | 0.658 | 0.00 |
| AKT selective attention (accuracy)*        | 54.2 | 1.3 | 54.1 | 1.4  | 54.3 | 1.0 | 54.1 | 1.3  | 0.846 | 0.00 |
| LNS verbal working memory span             | 5.2  | 0.9 | 5.1  | 0.8  | 5.3  | 0.7 | 5.1  | 0.9  | 0.496 | 0.01 |
| BTT visual immediate memory span (forward) | 4.9  | 0.8 | 5.1  | 0.8  | 5.4  | 0.8 | 5.2  | 0.8  | 0.234 | 0.03 |
| BTT visual working memory span (backward)  | 4.5  | 1.0 | 4.6  | 1.2  | 4.9  | 1.0 | 4.6  | 1.0  | 0.123 | 0.05 |
| VLMT verbal free recall (long delay)       | 7.5  | 3.5 | 7.1  | 3.2  | 7.8  | 3.7 | 8.1  | 3.7  | 0.439 | 0.01 |
| VLMT verbal recognition memory (accuracy)* | 8.3  | 5.0 | 8.3  | 4.7  | 8.3  | 4.8 | 8.4  | 5.6  | 0.695 | 0.00 |
| SVT decision making*                       | 15.9 | 1.9 | 16.0 | 1.3  | 16.6 | 1.0 | 15.8 | 1.5  | 0.288 | 0.03 |
| HADS anxiety                               | 4.9  | 2.9 | 5.7  | 3.5  | 3.1  | 2.6 | 4.9  | 3.2  | 0.053 | 0.06 |
| HADS depression                            | 2.9  | 2.4 | 3.3  | 2.1  | 2.9  | 3.3 | 3.4  | 2.7  | 0.602 | 0.01 |

- 1 All test parameters were calculated with the ANCOVA, except those marked with an asterisk (\*). Data are means
- 2 (SD). p=value.  $\eta^2$ =effect size. SKT=Syndrom-Kurztest (Short Performance Test). TMT=Trail Making Test.
- 3 RWT=Regensburger Wortflüssigkeits-Test (Regensburger Word Fluency Test). VLMT=Verbaler Lern- und
- 4 Merkfähigkeitstest (Auditory Verbal Learning and Memory Test). NVLT=Non-Verbal Learning Test.
- 5 AKT=Alterskonzentrationstest (Geriatric Concentration Test). LNS=Letter Number Span. BTT=Block Tapping Test.
- 6 SVT=Symbolverarbeitungstest (Symbol Processing Task). HADS= Hospital Anxiety and Depression Scale.

7

8 **Supplementary table 3:** SF-36 results per group and assessment time for the per-protocol analysis

| SF-36 Faktor                               | Timepoint          | Group    | Mean   | SD     | n  | p     | $\eta^2$ |
|--------------------------------------------|--------------------|----------|--------|--------|----|-------|----------|
| Physical functioning                       | Baseline           | Control  | 66.029 | 21.312 | 27 | 0.242 | 0.025    |
|                                            |                    | Training | 62.304 | 25.296 | 29 |       |          |
|                                            | 12-month follow-up | Control  | 70.370 | 21.791 | 27 |       |          |
|                                            |                    | Training | 79.464 | 25.569 | 29 |       |          |
| Role limitations due to physical health    | Baseline           | Control  | 47.115 | 43.201 | 26 | 0.015 | 0.109    |
|                                            |                    | Training | 38.218 | 40.368 | 29 |       |          |
|                                            | 12-month follow-up | Control  | 52.885 | 40.204 | 26 |       |          |
|                                            |                    | Training | 75.862 | 36.279 | 29 |       |          |
| Role limitations due to emotional problems | Baseline           | Control  | 84.524 | 32.052 | 28 | 0.025 | 0.092    |
|                                            |                    | Training | 70.370 | 38.490 | 27 |       |          |
|                                            | 12-month follow-up | Control  | 64.286 | 42.483 | 28 |       |          |
|                                            |                    | Training | 80.247 | 37.278 | 27 |       |          |
| Energy / Fatigue*                          | Baseline           | Control  | 52.115 | 17.842 | 26 | 0.148 | 0.03     |
|                                            |                    | Training | 49.333 | 16.802 | 30 |       |          |
|                                            | 12-month follow-up | Control  | 62.885 | 17.786 | 26 |       |          |
|                                            |                    | Training | 67.667 | 17.847 | 30 |       |          |
| Emotional well-being                       | Baseline           | Control  | 74.000 | 14.935 | 26 | 0.967 | 0        |
|                                            |                    | Training | 75.267 | 17.759 | 30 |       |          |
|                                            | 12-month follow-up | Control  | 75.077 | 13.917 | 26 |       |          |
|                                            |                    | Training | 78.267 | 14.694 | 30 |       |          |
| Social functioning                         | Baseline           | Control  | 79.018 | 22.062 | 28 | 0.113 | 0.044    |
|                                            |                    | Training | 84.167 | 16.059 | 30 |       |          |
|                                            | 12-month follow-up | Control  | 77.679 | 25.765 | 28 |       |          |
|                                            |                    | Training | 88.750 | 16.199 | 30 |       |          |
| Pain                                       | Baseline           | Control  | 84.643 | 18.767 | 28 | 0.049 | 0.068    |
|                                            |                    | Training | 77.500 | 27.606 | 30 |       |          |
|                                            | 12-month follow-up | Control  | 76.429 | 27.007 | 28 |       |          |
|                                            |                    | Training | 83.500 | 24.217 | 30 |       |          |
| General health*                            | Baseline           | Control  | 60.833 | 14.855 | 28 |       |          |

|                            |                    |          |        |        |    |        |       |
|----------------------------|--------------------|----------|--------|--------|----|--------|-------|
|                            |                    | Training | 57.716 | 15.353 | 29 |        |       |
|                            | 12-month follow-up | Control  | 58.705 | 18.414 | 28 |        |       |
|                            |                    | Training | 62.802 | 19.295 | 29 |        |       |
|                            |                    |          |        |        |    | 0.087  | 0.031 |
| Average of all factors     | Baseline           | Control  | 68.926 | 14.707 | 28 |        |       |
|                            |                    | Training | 63.664 | 16.819 | 30 |        |       |
|                            | 12-month follow-up | Control  | 67.190 | 17.038 | 28 |        |       |
|                            |                    | Training | 77.145 | 18.898 | 30 |        |       |
|                            |                    |          |        |        |    | <0.001 | 0.181 |
| Health change (Item 2)     | Baseline           | Control  | 35.714 | 24.934 | 28 |        |       |
|                            |                    | Training | 21.667 | 14.284 | 30 |        |       |
|                            | 12-month follow-up | Control  | 66.071 | 24.734 | 28 |        |       |
|                            |                    | Training | 71.667 | 25.200 | 30 |        |       |
|                            |                    |          |        |        |    | 0.037  | 0.075 |
| Physical component summary | Baseline           | Control  | 65.583 | 18.882 | 28 |        |       |
|                            |                    | Training | 59.215 | 20.113 | 29 |        |       |
|                            | 12-month follow-up | Control  | 64.531 | 19.040 | 28 |        |       |
|                            |                    | Training | 75.265 | 21.685 | 29 |        |       |
|                            |                    |          |        |        |    | 0.005  | 0.138 |
| Mental component summary   | Baseline           | Control  | 72.518 | 16.410 | 28 |        |       |
|                            |                    | Training | 68.989 | 17.117 | 30 |        |       |
|                            | 12-month follow-up | Control  | 69.848 | 20.157 | 28 |        |       |
|                            |                    | Training | 78.329 | 18.918 | 30 |        |       |
|                            |                    |          |        |        |    | 0.018  | 0.095 |

- 1 All test parameters were calculated with difference values between pre- and post-tests, followed by Mann–Whitney
- 2 U-test for between-subject effects, except those marked with an asterisk (\*), which were calculated by ANCOVA.
- 3 Data include means (SD). n=number of cases. p=p-value.  $\eta^2$ =effect size.
